# Supplementary material
Source: PubMed Central journal article supplement (PMC5940005)
Supplement: NIHMS958069-supplement-1.pdf [file NIHMS958069-supplement-1.pdf]

## Supplemental Information

### Fasting activates Fatty Acid Oxidation to enhance intestinal stem cell function during homeostasis and aging

Maria M. Mihaylova<sup>1,2,3,9,10</sup>, Chia-Wei Cheng<sup>2,10</sup>, Amanda Q. Cao<sup>1,2,3,9,11</sup>, Surya Tripathi<sup>2,11</sup>, Miyeko D. Mana<sup>2</sup>, Khristian E. Bauer-Rowe<sup>2</sup>, Monther Abu-Remaileh<sup>1,2,3,9</sup>, Laura Clavain<sup>1</sup>, Aysegul Erdemir<sup>2</sup>, Caroline A. Lewis<sup>1</sup>, Elizaveta Freinkman<sup>1</sup>, Audrey S. Dickey<sup>4</sup>, Albert R. La Spada<sup>4</sup>, Yanmei Huang<sup>1</sup>, George W. Bell<sup>1</sup>, Vikram Deshpande<sup>5</sup>, Peter Carmeliet<sup>6,7</sup>, Pekka Katajisto<sup>8</sup>, David M. Sabatini<sup>1,2,3,9,12</sup>\* and Ömer H. Yilmaz<sup>2,3,5,12,13</sup>\*

**A**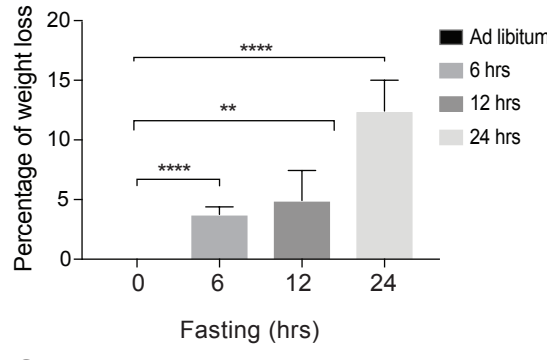**B**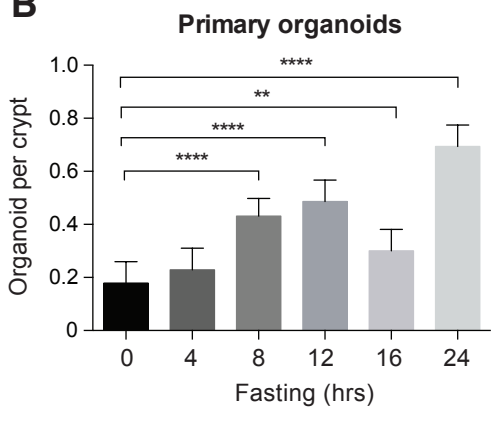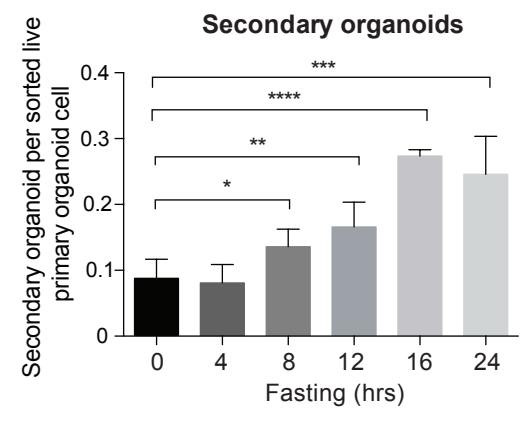**C**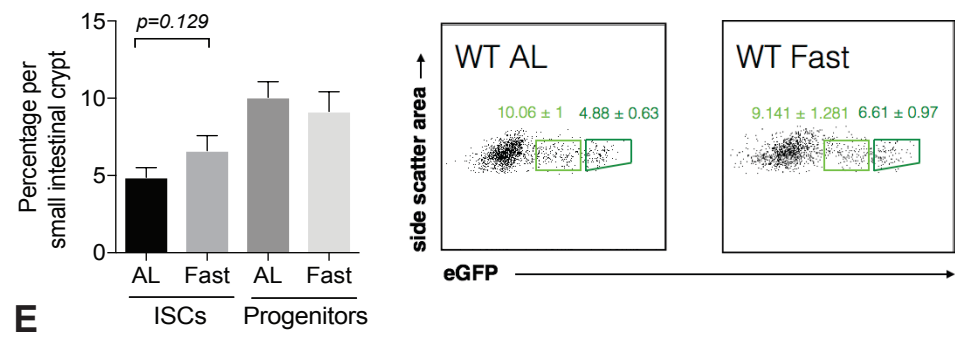**D**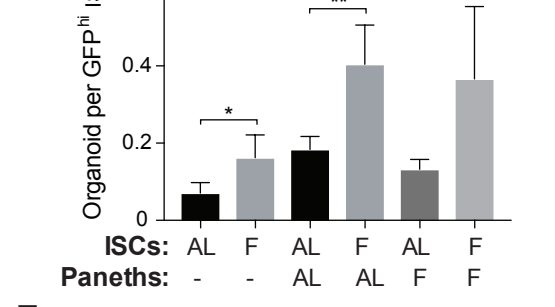**E**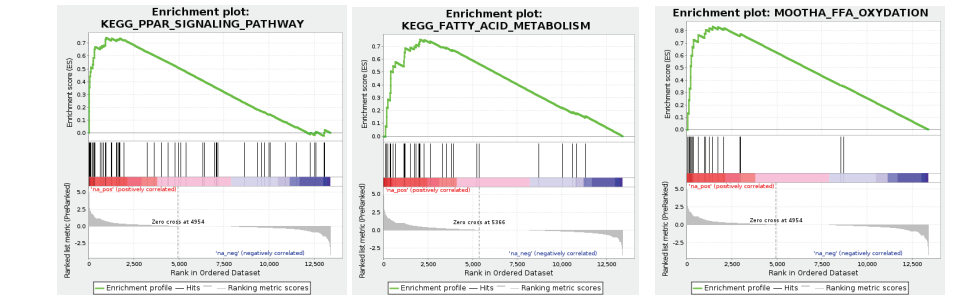**F**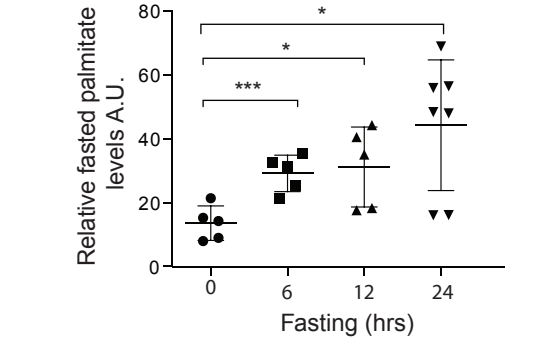**G**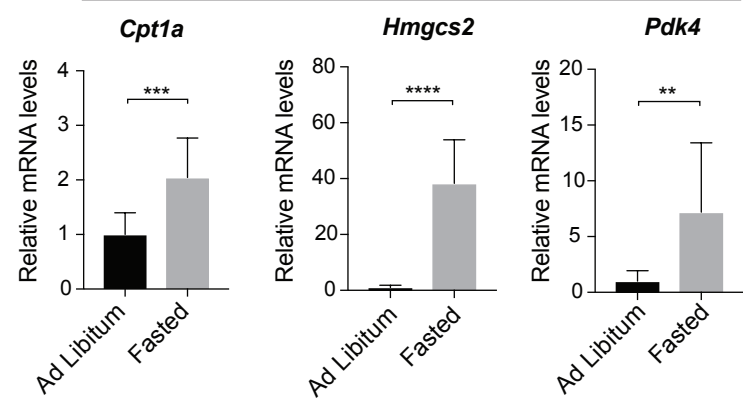**H**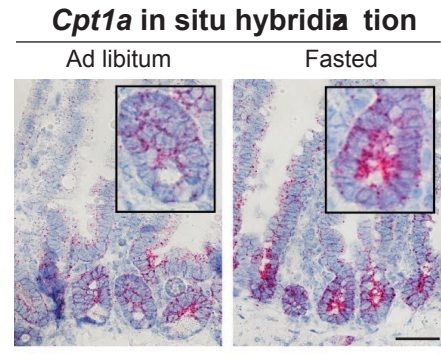**I**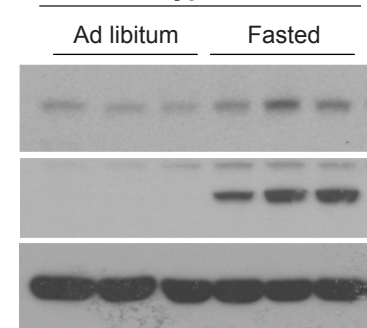**J**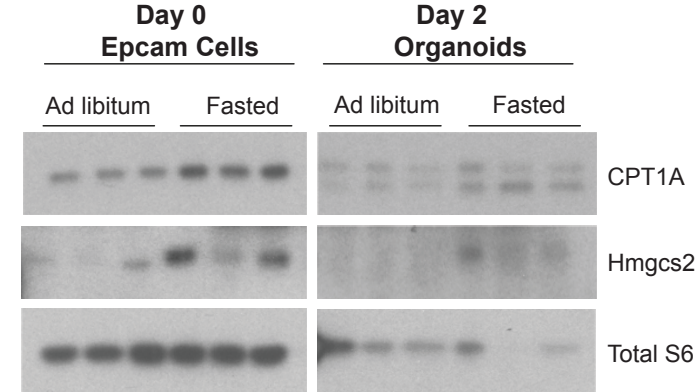

**Supplementary Figure 1: Fasting induces fatty acid oxidation (FAO) and improves organoid formation of crypts and ISCs, Related to Figure 1.**

**(A)** Weight-loss (%) during fasting. Mice were fasted for 6-24 hours and individual weight loss was measured and normalized to the original weight (ad libitum). n=5 mice per group per time point.

**(B)** Increased clonogenic potential in primary and secondary organoids correlated with duration of fast. n=2 mice for each time point.

**(C)** Quantification of ISCs (Lgr5-GFP<sup>hi</sup>) and progenitor cells (Lgr5-GFP<sup>low</sup>) from ad libitum (AL) and fasted animals by flow cytometry. Representative flow cytometry plots are illustrated. AL n=15, Fast n= 10.

**(D)** ISCs from fasted animals (F) had significantly enhanced organoid-forming capacity when mixed with aged matched AL Paneth cells. Fasted Paneth cell did not further boost clonogenic potential of ISCs. Mice were fasted for 24 hours prior to crypt isolation and cell sorting. n=3 mice per group.

**(E)** Gene-set enrichment analysis (GSEA) of RNA-Seq indicates fasting up-regulated PPAR targets (left), fatty acid metabolism (middle) and fatty acid oxidation (right).

**(F)** Fasting elevated plasma palmitate levels. Blood samples were collected from 3-4 month old mice fasted for 0, 6, 12 and 24 hours. Levels of palmitate in plasma were measured using LC-MS. n=5 per group per time point.

**(G)** Fasting increased mRNA expression levels of fatty acid transport and metabolism genes in intestinal crypts. *Cpt1a*, *Carnitine palmitoyltransferase I*; *Hmgcs2*, *hydroxymethylglutaryl CoA synthase 2*; *PDK4*, *pyruvate dehydrogenase kinase isoform 4*. n=12 for young AL, n=8 for young fasted.

**(H)** Fasting induced *Cpt1a* expression. Representative images of *Cpt1a* in situ hybridization. *Cpt1a* (red) mRNA in crypts of 3-4 month fed ad libitum or fasted for 24 hours (Fast). Scale bar, 100  $\mu$ m.

**(I)** Western blot analysis of *Cpt1a* and *Hmgcs2* in intestinal crypts of ad libitum and fasted mice, n=3 per group.

**(J)** Western blots showing induced PPAR targets CPT1a and Hmgcs2 in fasted animals from sorted epithelial cells (Epcam<sup>+</sup>) on day of plating (day 0) and retained induction in fasted organoids following post 2 days of culture in crypt/organoid media. n=3 mice each.

Unless otherwise specified, data are mean  $\pm$  s.d. \* $p < 0.05$ , \*\* $p < 0.01$ , \*\*\* $p < 0.001$ .

Student's t-test, unpaired.

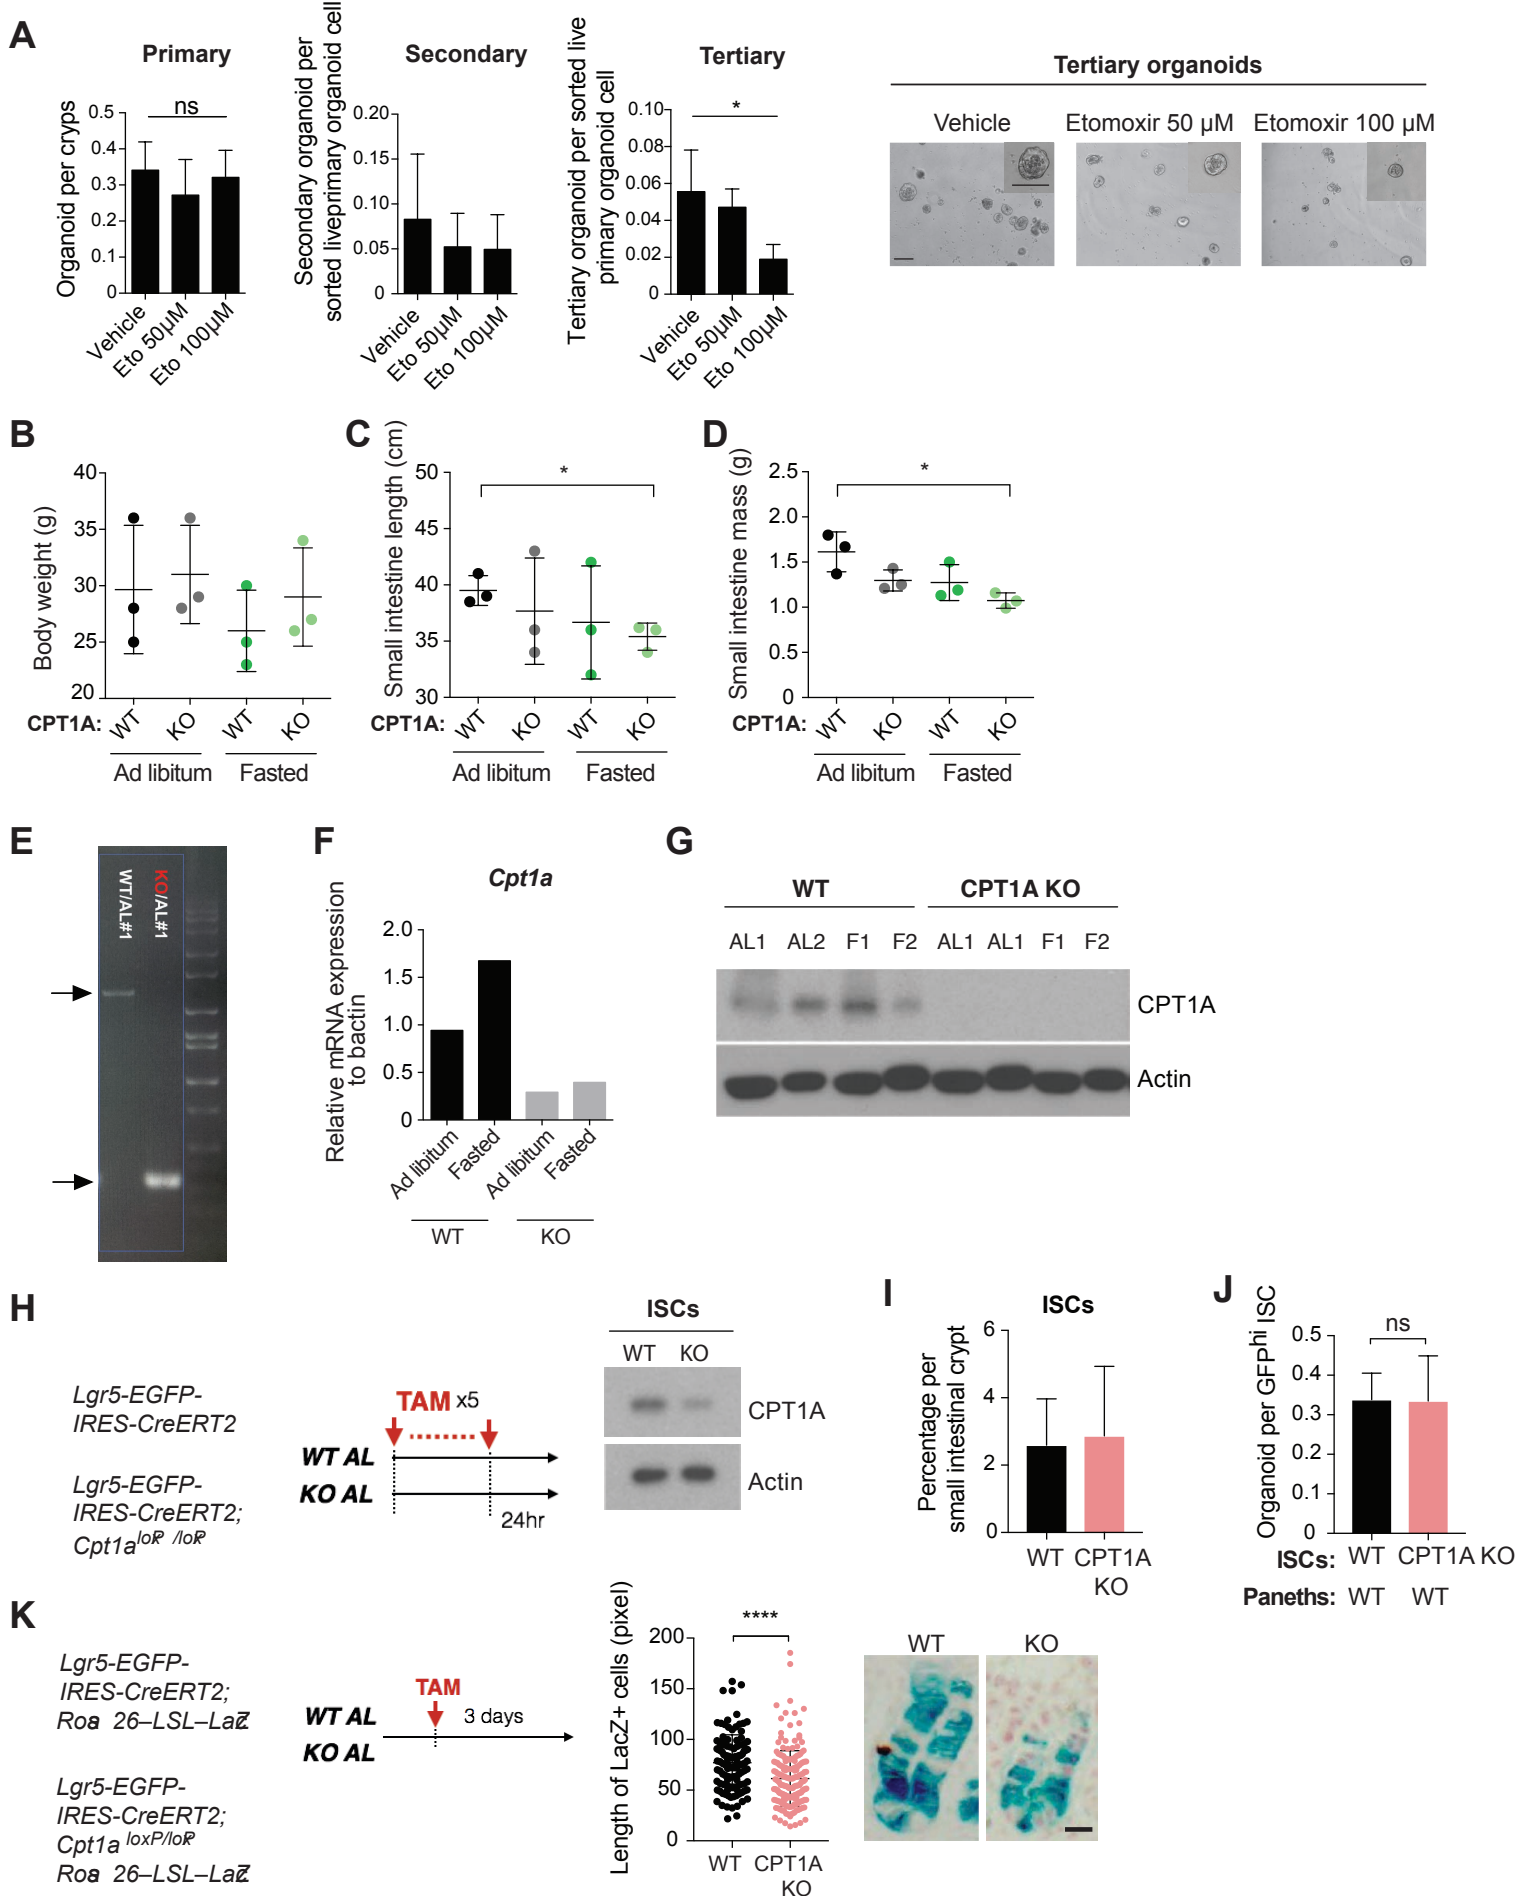

**Supplementary Figure 2: Inhibition of FAO impairs organoid formation ex- vivo, Related to Figure 2.**

**(A)** Inhibition of CPT1A by etomoxir reduced tertiary organoid-forming capacity of naïve crypts derived from ad libitum mice. From left to right, frequencies of organoid formation from crypts (primary, day 3), from 5,000 sorted live primary organoid cells (secondary, day 3) and from 5,000 sorted live secondary organoid cells (tertiary day 3). n=3 per group. Scale bar, 100  $\mu$ m.

**(B)** Deletion of *Cpt1a* gene did not affect body weight. n=3 mice per group.

**(C- D)** *Cpt1a* deletion reduced small intestinal length **(C)** and small intestinal mass **(D)** only upon fasting compared to controls. n=3 mice per group.

**(E)** Confirmation of *Cpt1a* deletion. Gene deletion was confirmed by PCR using the outside primers framing the loxp sites.

**(F)** Confirmation of disrupted *Cpt1a* mRNA by qRT-PCR relative to b-actin levels in KO mice versus controls in ad libitum and fasted states.

**(G)** Confirmation of CPT1A protein depletion in intestinal crypts of CPT1A KO mice compared to controls.

**(H)** Schematic of acute ablation of CPT1A in ISCs in the *Lgr5-EGFP-IRES-CreERT2* model and western blot analysis from sorted ISCs showing CPT1A depletion versus control levels.

**(I)** Quantification of GFP<sup>+</sup> ISCs in *Lgr5-EGFP-CreERT2* and *Lgr5-EGFP-CreERT2; Cpt1a<sup>lox/lox</sup>* mice by flow cytometry analysis. n=3 each.

**(J)** Frequency of organoids formed per ISCs in *Lgr5-EGFP-IRES-CreERT2* and *Lgr5-EGFP-IRES-CreERT2; Cpt1a<sup>lox/lox</sup>* mice. WT n=4, CPT1a KO n=4

**(K)** Schematic of lineage tracing experiments and quantification of number of LacZ positive cells upon *Cpt1a* loss and in controls. WT n=3, CPT1a KO= 4.

Unless otherwise specified, data are mean  $\pm$  s.d. \* $p < 0.05$ , \*\*\*\* $p < 0.0005$ . Student's t-test, unpaired. Scale bar, 20  $\mu\text{m}$ .

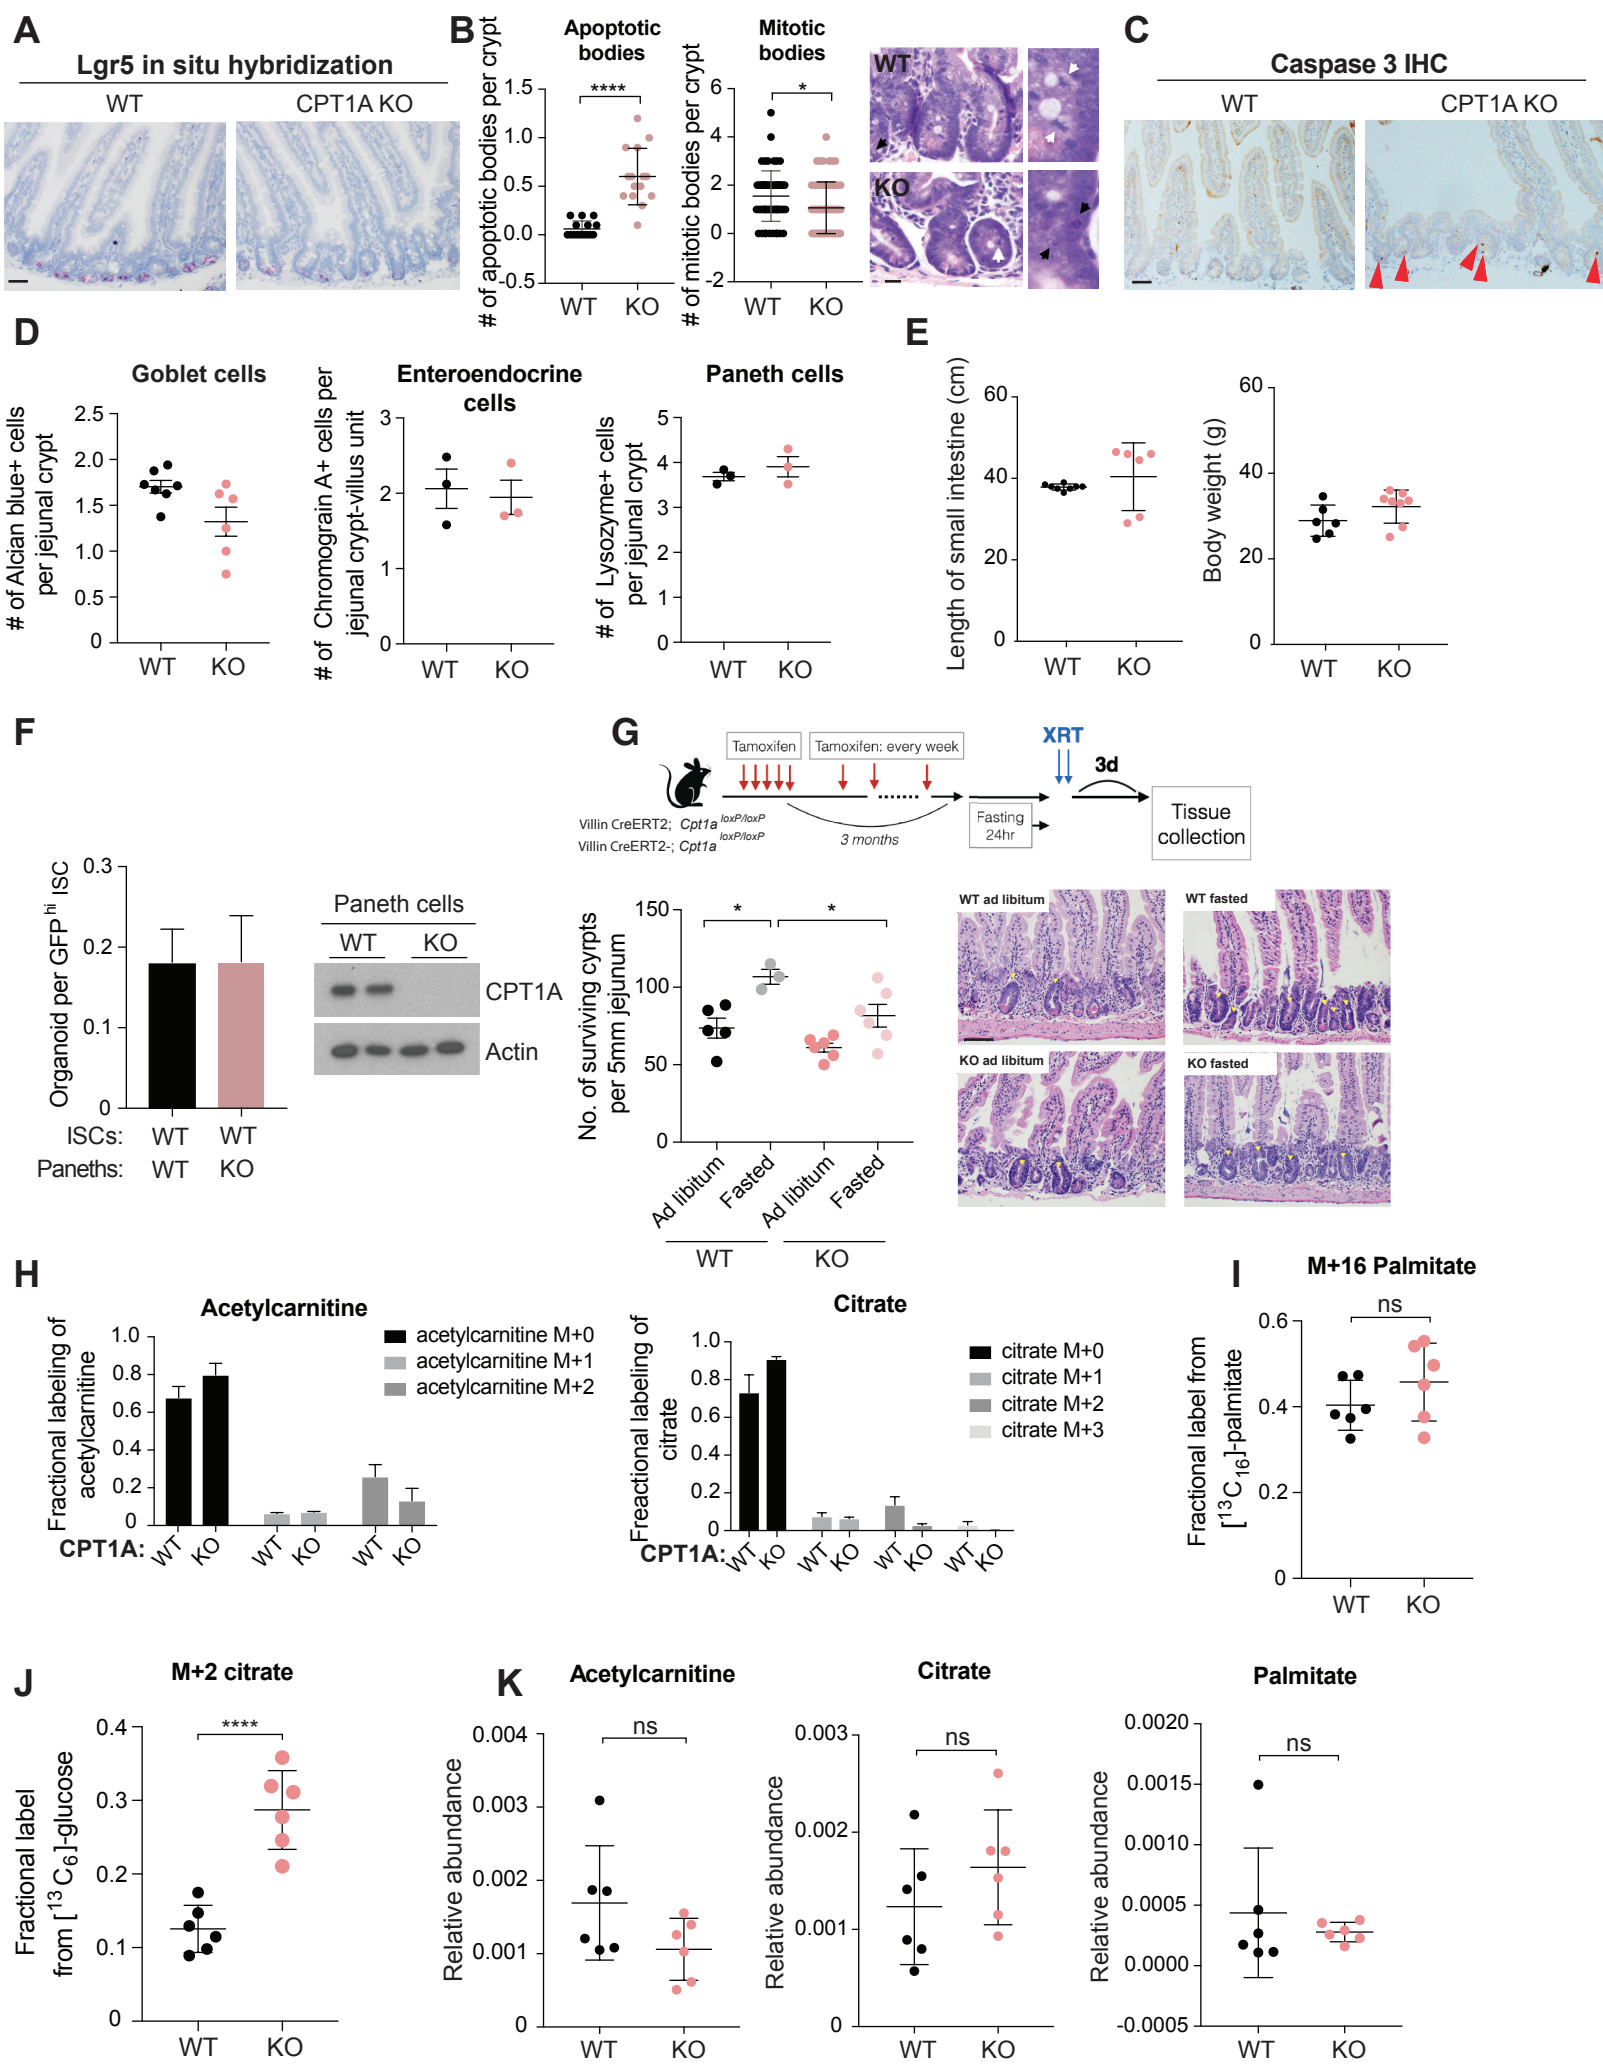



**Supplementary Figure 3: Long-term CPT1A deletion reduces ISC numbers and proliferation, Related to Figure 3.**

**(A)** Representative images of *in situ* hybridization for *Lgr5* levels in *Villin-CreERT2<sup>-/-</sup>*; *Cpt1a<sup>loxP/loxP</sup>* and *Villin-CreERT2*; *Cpt1a<sup>loxP/loxP</sup>* intestines. n= 3 mice per group. Scale bar, 100  $\mu$ m.

**(B)** Long-term intestinal deletion of CPT1A increased apoptosis and reduced mitosis in intestinal crypts. Representative images indicate apoptotic bodies (black arrowhead) and mitotic bodies (white arrowhead) in intestinal crypts of WT and CPT1A KO mice. n= 3 mice per group. Scale bar, 20  $\mu$ m.

**(C)** CPT1A KO intestines have significantly higher Caspase 3 positive cells in crypts compared to controls. Immunostains for Caspase 3 positive cells in WT and CPT1A KO intestines. Arrows represent Caspase 3 positive cells in the crypts. n= 3 mice per group. Scale bar, 100  $\mu$ m.

**(D)** Enumeration of goblet, enteroendocrine and Paneth cells showed no differences between CPT1A KO intestines compared to WT. n= 3 mice per group.

**(E)** Body weight and intestinal length of WT and CPT1A KO intestines remained unchanged. n=6 mice per group.

**(F)** Mixing experiment of WT ISCs with WT or CPT1A KO Paneth cells. n=4 mice WT and n=4 mice CPT1A KO mice. Adjacent panel is western blot analysis confirming CPT1a deletion.

**(G)** Quantification of surviving crypts from WT ad libitum, WT fasted, CPT1A KO ad libitum and CPT1A KO fasted irradiated mice. WT Ad libitum n=5, WT Fasted n=3, CPT1A KO Ad libitum n= 6, CPT1A KO Fasted n=6. Scale bar, 100  $\mu$ m.

**(H)** Fraction of total levels of acetylcarnitine and citrate for WT and CPT1A KO crypts labeled with [U-<sup>13</sup>C] palmitate. n=6 WT and n=6 CPT1A KO mice.

**(I)** Fraction of total levels of M+16 palmitate for WT and CPT1A KO crypts labeled with [U<sup>13</sup>-C] palmitate. n=6 WT and n=6 CPT1A KO mice.

**(J)** Fractional labeling of M+2 citrate following [U-<sup>13</sup>C] glucose tracing. n=6 WT and n=6 CPT1A KO mice. n=6 WT and n=6 CPT1A KO mice.

**(K)** Total pools normalized to total protein for acetylcarnitine, citrate and palmitate. n=6 WT and n=6 CPT1A KO mice. n=6 WT and n=6 CPT1A KO mice.

Unless otherwise specified, data are mean ± s.d. \* $p < 0.05$ , \*\* $p < 0.01$ , \*\*\* $p < 0.001$ , \*\*\*\* $p < 0.0005$ . Student's t-test, unpaired.

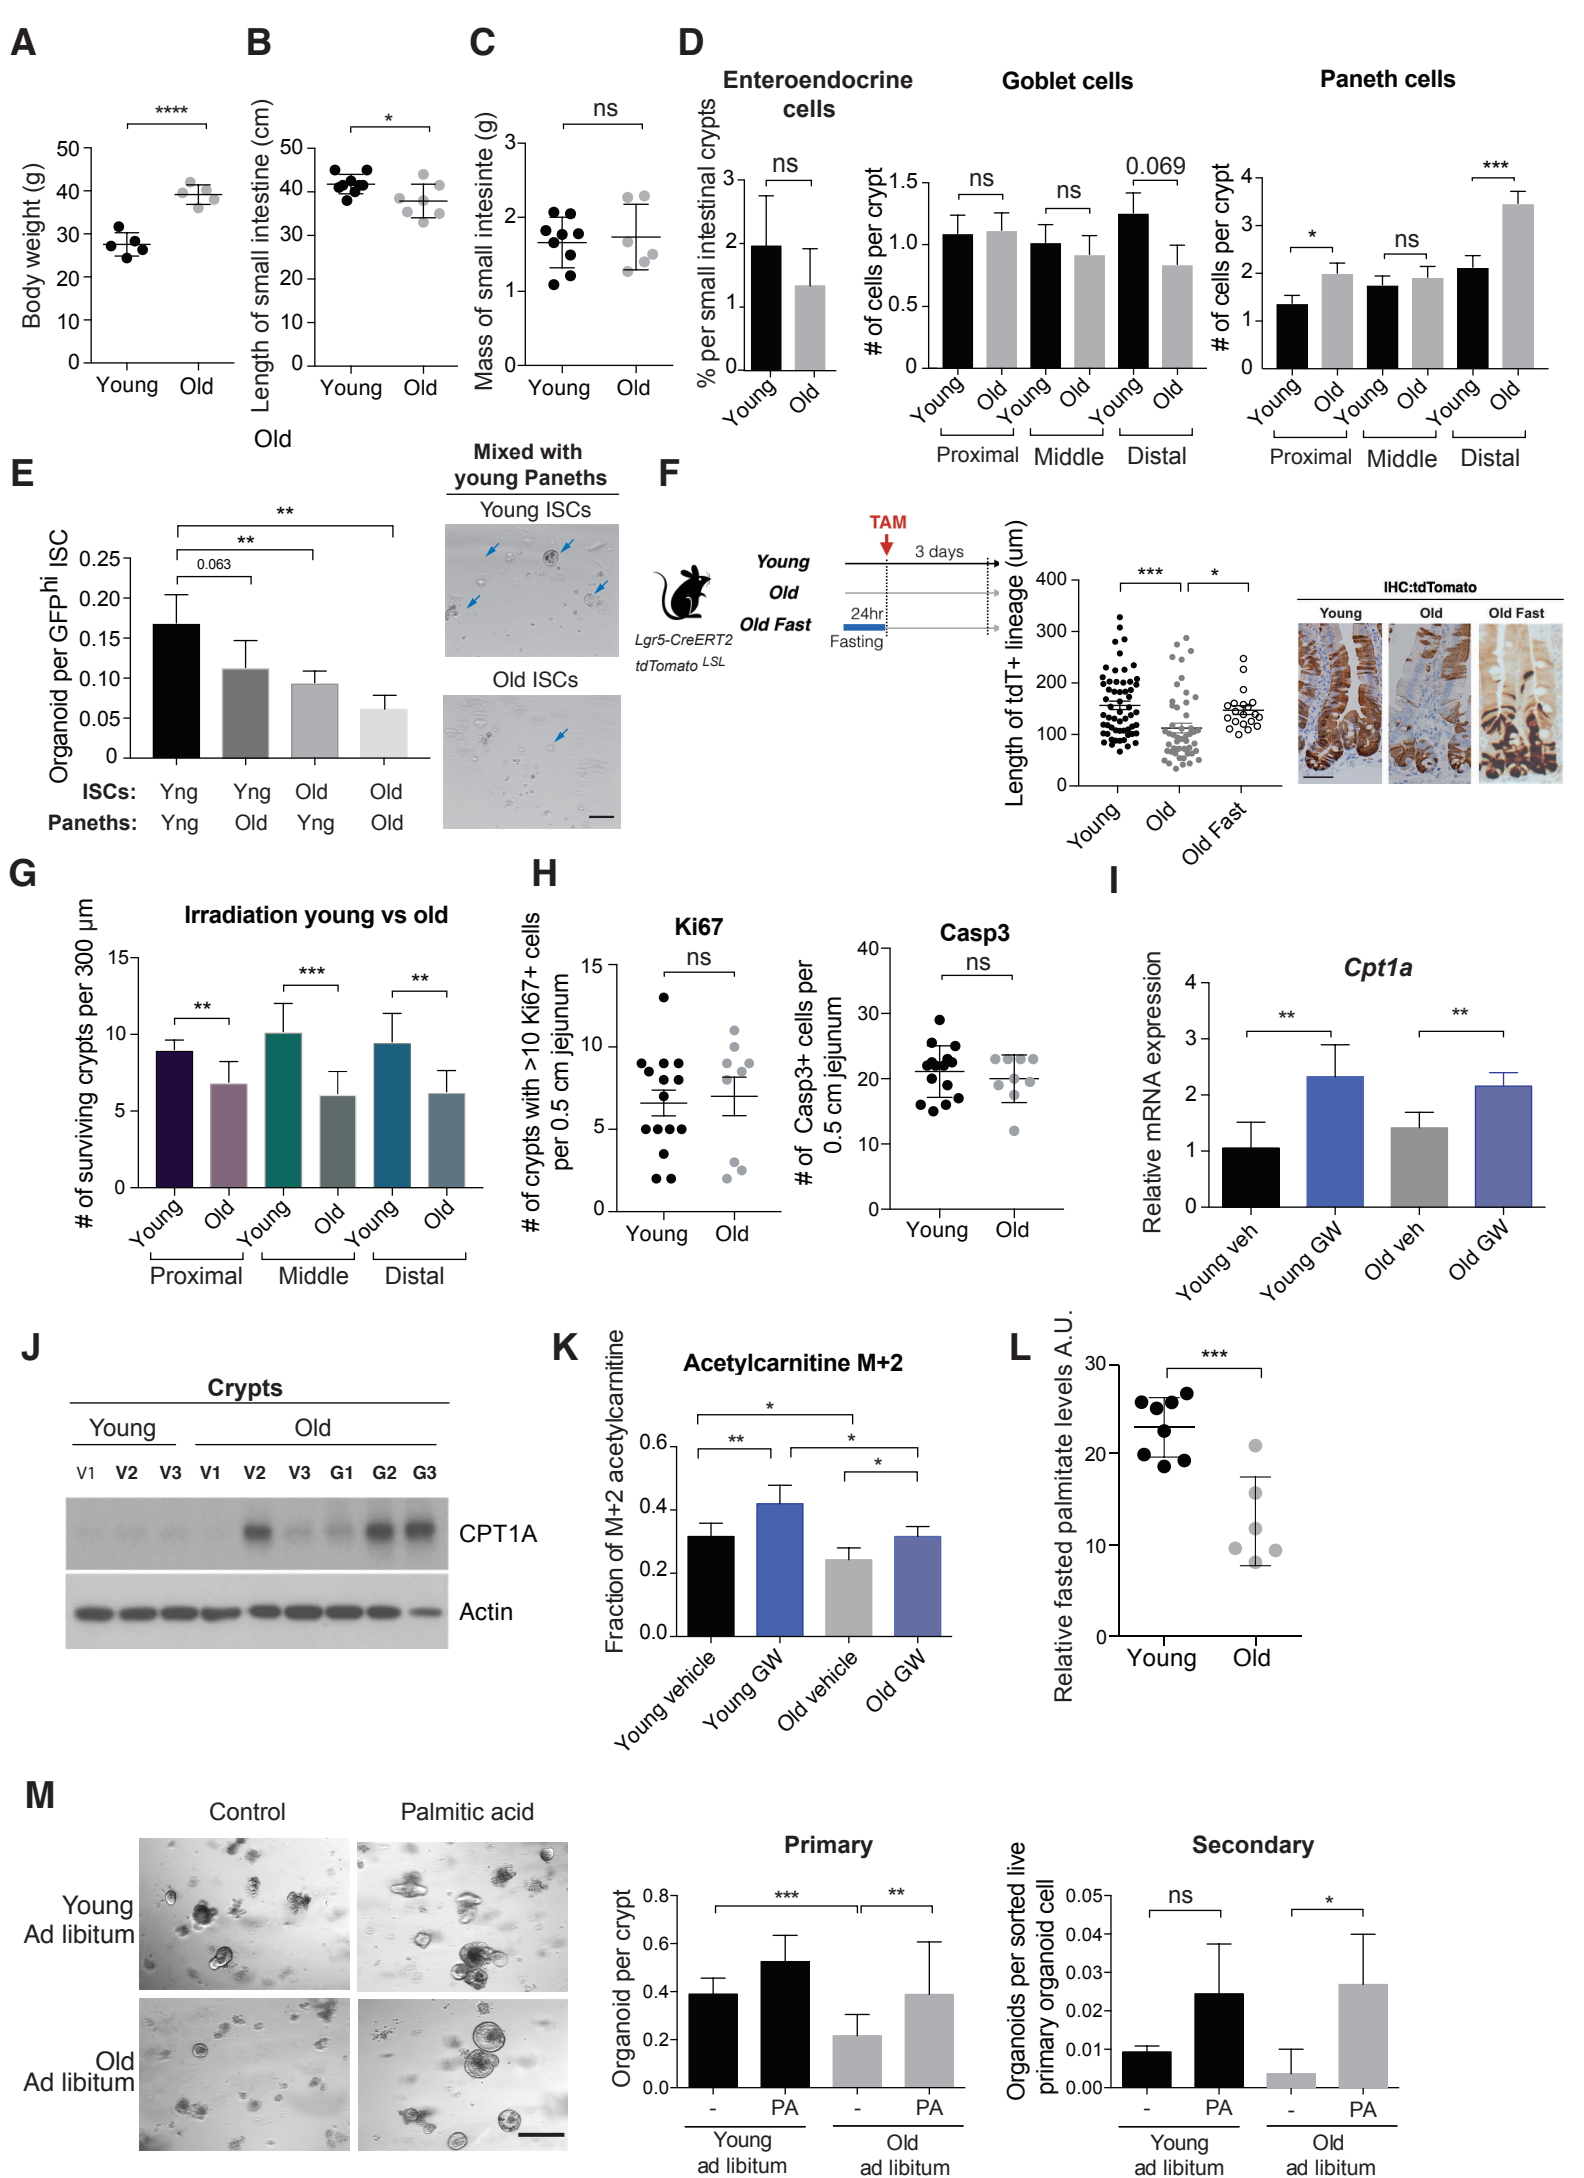

**Supplementary Figure 4: Age-associated decline of intestinal stem cell numbers and function, Related to Figure 4.**

**(A)** Aging significantly increased body mass. young: n=5, old: n=5.

**(B)** In comparison to young mice, old mice had shorter small intestines young: n=10, old: n=7).

**(C)** Aging did not change small intestinal mass. young: n=8, old: n=7.

**(D)** No significant difference in the numbers of enteroendocrine cells and goblet cells, while region specific increase of Paneth cells was detected in crypts of old mice relative to young mice. young: n=6, old: n=7.

**(E)** Aged stem cells have reduced capacity for organoid formation. Mixing experiment of young and old ISCs with young and old Paneth cells. Counts performed at day 3 post plating. n=4 per group. Scale bar, 20  $\mu$ m.

**(F)** Enhanced intestinal stem cell function following fasting in aged animals. Lgr5-derived tdTomato<sup>+</sup> (tdT<sup>+</sup>) progeny were significantly reduced during aging. Representative pictures of tdT<sup>+</sup> Lgr5-derived progeny in the proximal intestine in young and aged Lgr5-cre;tdTomato<sup>LSL</sup> mice, at 3 days post one tamoxifen injection. Scale bar, 50  $\mu$ m.

**(G)** Intestinal crypts from aged animal were compromised after challenged by a lethal dose of irradiation (7.5Gy x 2). Numbers of surviving crypts per 300  $\mu$ m in the indicated region (i.e. proximal, middle and distal small intestine) after ionizing irradiation-induced (XRT) damage in young and aged mice. n=6 to 8 per group.

**(H)** Quantification of ki67 and Casp3 positive cells in animals described in **(G)**.

**(I)** qRT-PCR analysis for *Cpt1a* mRNA levels in sorted ISCs from vehicle (veh) or GW501516 (GW) treatment group, n=6 per group.

**(J)** Western blot analysis of protein levels of CPT1A in crypts from young or old mice treated with vehicle or GW501516 (GW); Young vehicle (V) n = 3, Old vehicle (V) n= 3, GW (G) n=3 per group.

**(K)** Results of [U-<sup>13</sup>C] palmitate labeling experiment indicate an increase of FAO *in vivo* following GW treatment. Animals were treated with vehicle or GW for 3-4 weeks. Crypts from young vehicle and GW treated animals were labeled using [U-<sup>13</sup>C] palmitate for 1 hour and analyzed using LC-MS. n=7 for young vehicle, n=5 for young GW, n=6 for old vehicle and n=3 for old GW.

**(L)** Levels of fasting plasma palmitate are significantly lower in old mice. Blood samples were collected from young and old mice fasted for 24 hours. Levels of palmitate in plasma were measured using LC-MS. Young n=8, old n=6 per group per time point.

**(M)** In vitro exposure to palmitic acid increases both the primary and secondary organoid potential of naive crypts from old mice fed ad libitum (AL). Representative images of day-3 organoids. Primary: Young AL, old AL and old fasted mice cultured with 30  $\mu$ M palmitic acid (PA) in primary organoid cultures. Secondary: Frequencies of organoid formation from crypts (primary, day-5) and of 5,000 sorted live primary organoid cells (secondary, day-3) after 7-10 days of 30  $\mu$ M palmitic acid treatment. n= 8 replicates, n=4 mice. Scale bar, 100  $\mu$ m.

Unless otherwise specified, data are mean  $\pm$  s.d. \* $p < 0.05$ , \*\* $p < 0.01$ , \*\*\* $p < 0.001$ , \*\*\*\* $p < 0.0005$ . Student's t-test, unpaired.

**Supplemental Table 1 (related to STAR Methods). Primer sequence:**

| Primer               | Sequence               |
|----------------------|------------------------|
| <i>Beta actin</i> F: | GGCTGTATTCCCCTCCATCG   |
| <i>Beta actin</i> R: | CCAGTTGGTAACGCCATGT    |
| <i>Cpt1a</i> F:      | CCATGAAGCCCTCAAACAGATC |
| <i>Cpt1a</i> R:      | ATCACACCCACCACCACGATA  |
| <i>Hmgcs2</i> F:     | ATACCACCAACGCCTGTTATGG |
| <i>Hmgcs2</i> R:     | CAATGTCACCACAGACCACCAG |
| <i>Pdk4</i> F:       | AGGGAGGTTCGAGCTGTTCTC  |
| <i>Pdk4</i> R:       | GGAGTGTTCACTAAGCGGTCA  |
